# Supplementary material for: Palladium nanoparticles on chitin-derived nitrogen-doped carbon materials for carbon dioxide hydrogenation into formic acid
Source: Royal Society of Chemistry journal article supplement (doi:10.1039/d2ra06462f), 2022-01-01
Supplement: d2ra06462f1.pdf [file d2ra06462f1.pdf]

## Supplementary Information

### **Palladium Nanoparticles on Chitin-derived Nitrogen-doped Carbon Materials for Carbon Dioxide Hydrogenation into Formic Acid**

Jingyu Wang,<sup>†a</sup> Lei Zhang,<sup>†a</sup> Fangming Jin<sup>\*ab</sup> and Xi Chen<sup>\*a</sup>

<sup>a</sup> *China-UK Low Carbon College, Shanghai Jiao Tong University, 3 Yinlian Rd, 201306, Shanghai, China.*

<sup>b</sup> *School of Environmental Science and Engineering, Shanghai Jiao Tong University, 201306 Shanghai, China.*

<sup>†</sup> Corresponding emails: [chenxi-lcc@sjtu.edu.cn](mailto:chenxi-lcc@sjtu.edu.cn), [fmjin@sjtu.edu.cn](mailto:fmjin@sjtu.edu.cn)

<sup>†</sup> The authors contributed equally.

**Table S1** Relative content of C and N species on chitin-derived N-doped carbon materials.

| Sample | C 1s              |       |       |                   |        | N 1s        |                   |            |              |         |
|--------|-------------------|-------|-------|-------------------|--------|-------------|-------------------|------------|--------------|---------|
|        | sp <sup>2</sup> C | C-N   | C-O   | C=O               | C(O)OH | Pyridinic N | C-NH <sub>2</sub> | Pyrrolic N | Graphitric N | N oxide |
| C-HC   | 60.22             | 18.87 | 5.81  | 8.97              | 6.13   | 37.04       | 2.22              | 47.91      | 9            | 3.82    |
| C-600  | 53.82             | 18.99 | 10.2  | 7.97              | 8.38   | 31.75       | 5.67              | 47.88      | 11           | 3.71    |
| C-TC   | 52.6              | 19.04 | 10.49 | 11.6 <sub>8</sub> | 6.19   | 29.14       | 5.17              | 48.55      | 12.35        | 4.79    |

**Table S2** ICP-MS test results of Pd catalysts.

| Catalyst | Pd (wt%) |
|----------|----------|
| Pd/C-HC  | 3.3      |
| Pd/C-600 | 5.1      |
| Pd/C-TC  | 5.2      |

**Table S3** Relative content of N and Pd species on Pd catalyst surface.

| Catalyst | N specie    |                   |            |             |         | Pd specie                         |                                    |                                   |                                    |
|----------|-------------|-------------------|------------|-------------|---------|-----------------------------------|------------------------------------|-----------------------------------|------------------------------------|
|          | Pyridinic N | C-NH <sub>2</sub> | Pyrrolic N | Graphitic N | N oxide | Pd <sup>0</sup> 3d <sub>5/2</sub> | Pd <sup>2+</sup> 3d <sub>5/2</sub> | Pd <sup>0</sup> 3d <sub>3/2</sub> | Pd <sup>2+</sup> 3d <sub>3/2</sub> |
| Pd/C-HC  | 16.6        | 14.36             | 34.0       | 26.4        | 8.7     | 28.5                              | 14.6                               | 20.0                              | 36.9                               |
| Pd/C-600 | 23.0        | 13.1              | 33.6       | 21.7        | 8.6     | 31.5                              | 15.0                               | 20.5                              | 33.0                               |
| Pd/C-TC  | 24.9        | 12.8              | 32.7       | 22.3        | 7.3     | 26.1                              | 13.0                               | 17.4                              | 43.5                               |

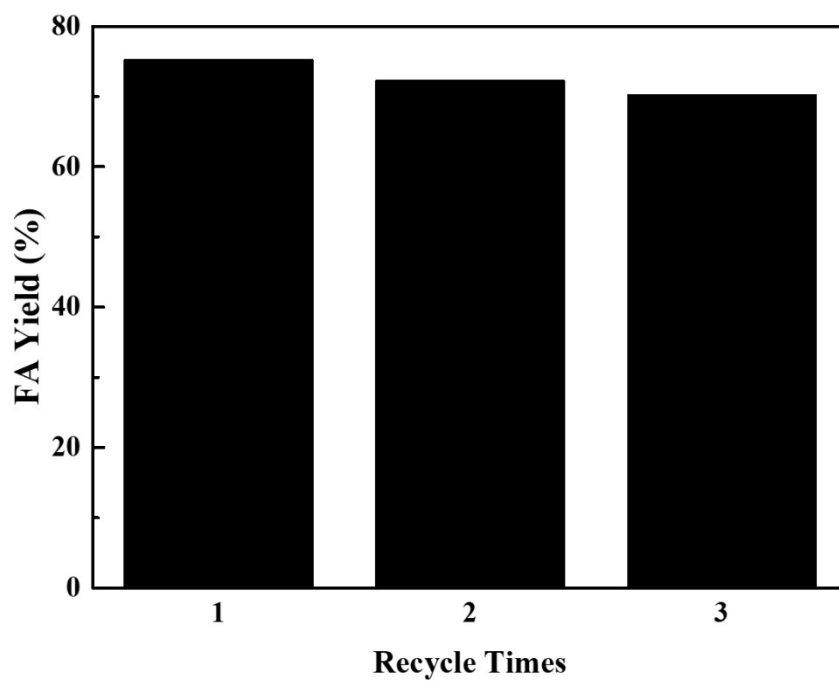

**Fig. S1** The recycling test of Pd/C-TC on bicarbonate hydrogenation into FA. Reaction conditions: 5 mmol  $\text{KHCO}_3$ , 5 mL water, 3 MPa  $\text{H}_2$ , 100 °C, 3 h, Pd/C-TC (6 wt%), n (substrate)/n (Pd) = 400:1.

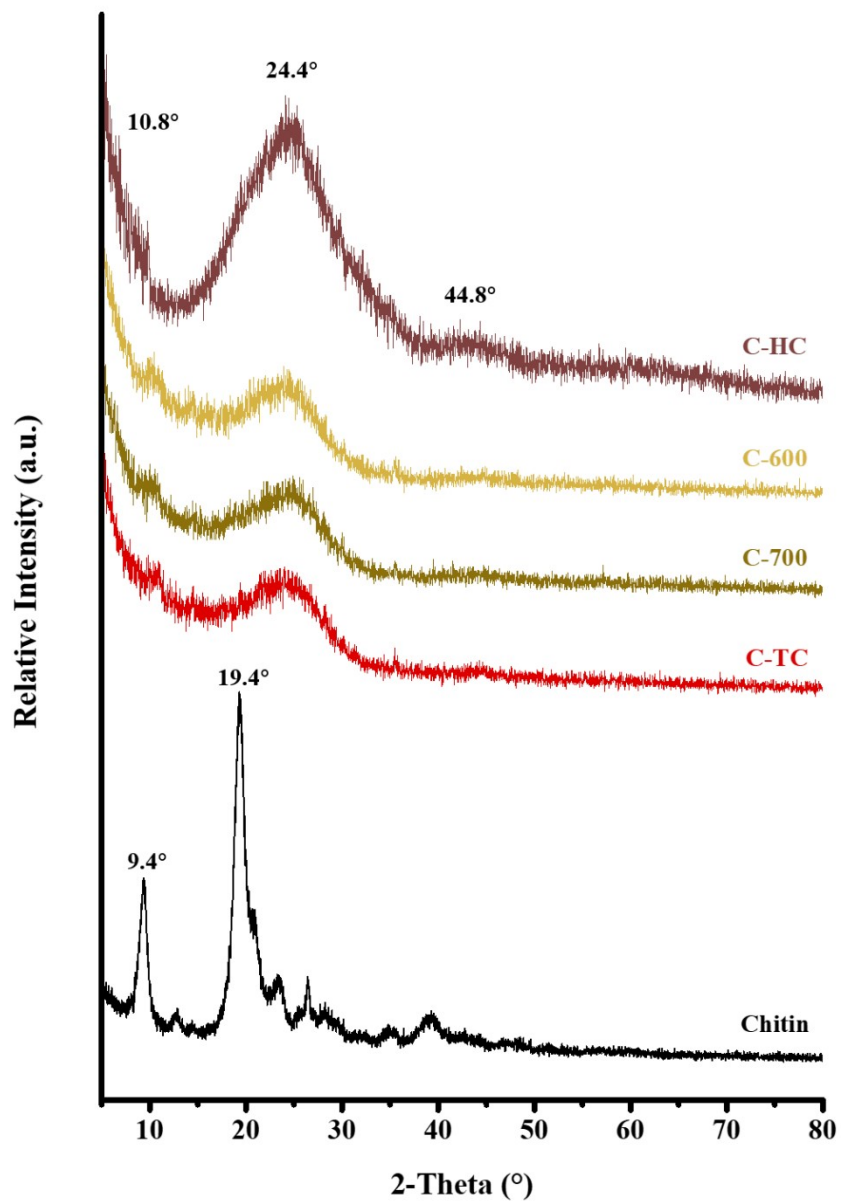

Fig. S2 XRD patterns of chitin and four N-doped carbon materials.

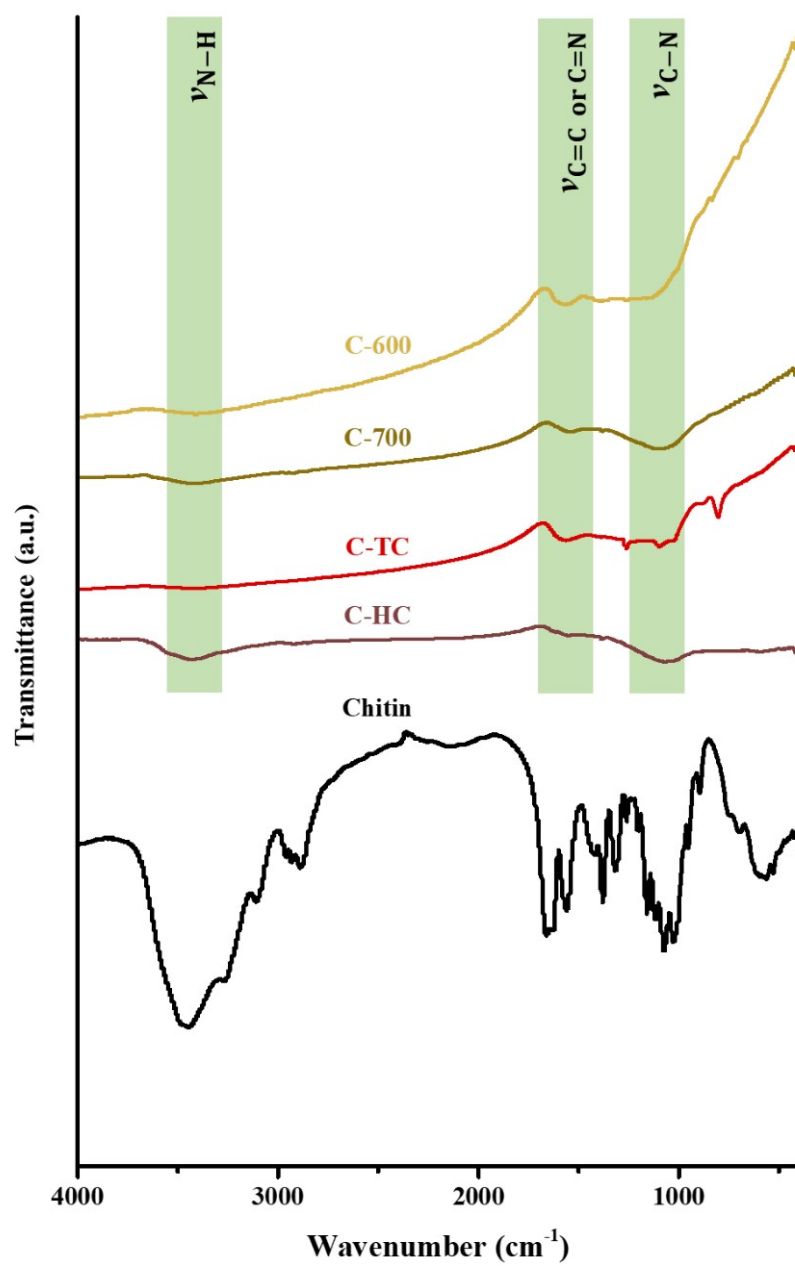

Fig. S3 FTIR spectra of chitin and four N-doped carbon materials.

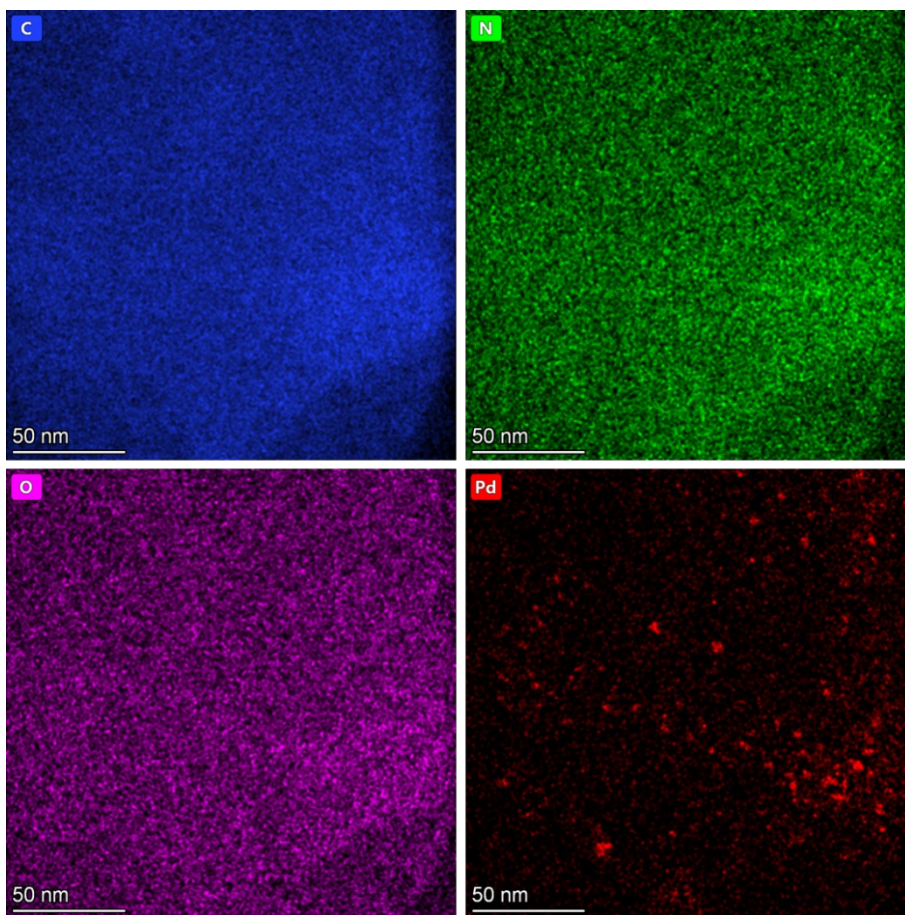

**Fig. S4** EDS mapping diagram of catalyst Pd/C-TC.

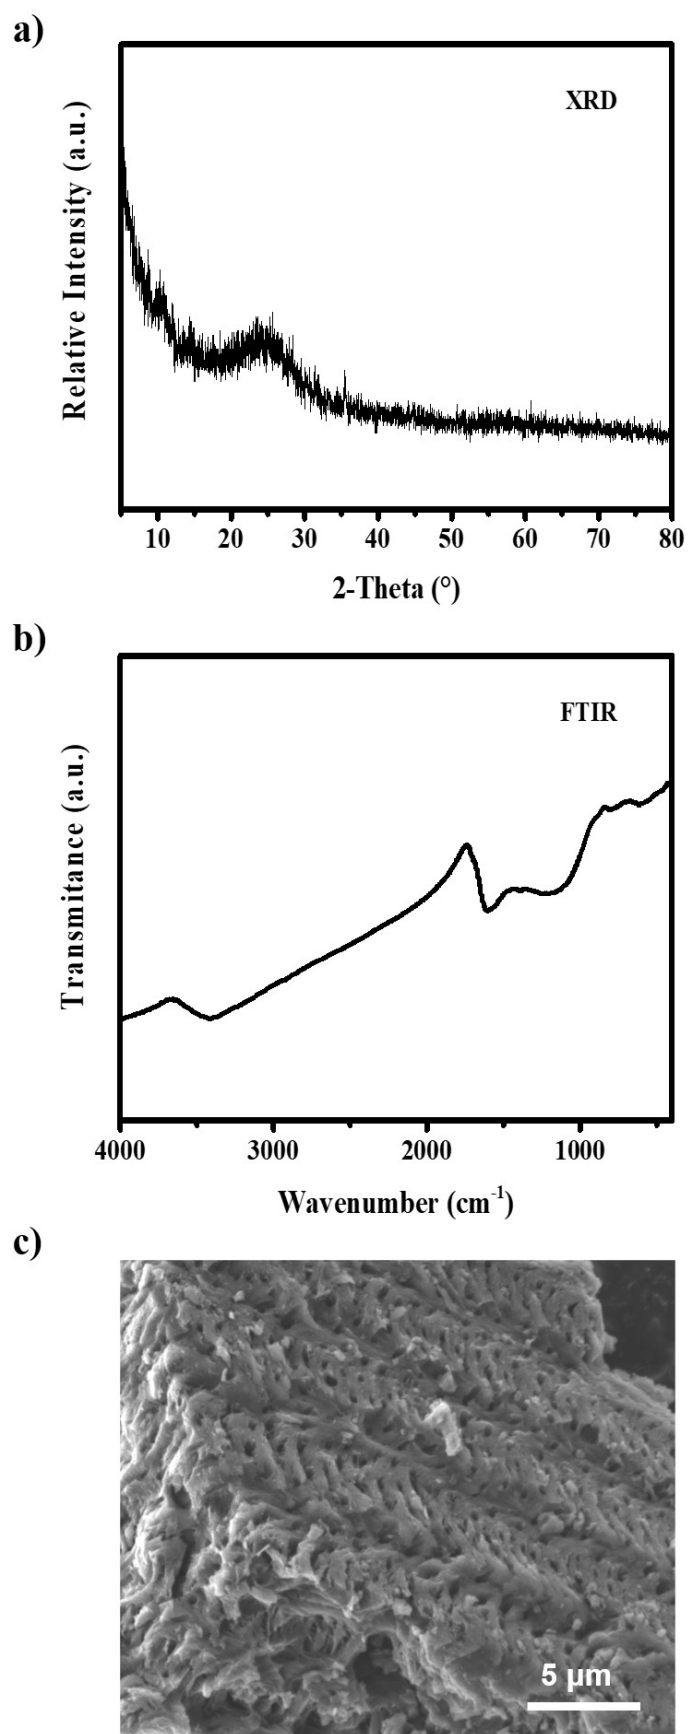

**Fig. S5** The XRD pattern (a), FTIR pattern (b), and SEM image (c) of S-TC.
